# Supplementary material for: An ionic liquid-modified reduced graphene oxide electrode material with favourable electrochemical properties
Source: Royal Society of Chemistry journal article supplement (doi:10.1039/d0nj00914h), 2020-01-01
Supplement: d0nj00914h1.pdf [file d0nj00914h1.pdf]

Electronic Supplementary Material (ESI) for New Journal of Chemistry.

This journal is © The Royal Society of Chemistry and the Centre National de la Recherche Scientifique 2020

## An ionic liquid-modified reduced graphene oxide electrode material with favourable electrochemical properties

Chang Dong, Yijia Yu, Xiaoling Zhang, Liyan Huang\*, Ying Wu, Jun Li and Zhengping Liu

**Address:** Beijing Key Laboratory of Energy Conversion and Storage Materials, College of Chemistry, Beijing Normal University, Beijing 100875, P. R. China

**E-mail:** [hly@bnu.edu.cn](mailto:hly@bnu.edu.cn)

**This updated version of the Electronic Supplementary Information replaces the original version first published on-line on 31 Mar 2020. There were some minor errors in the title, Table S1 and Table S2 which have now been corrected in this updated version.**

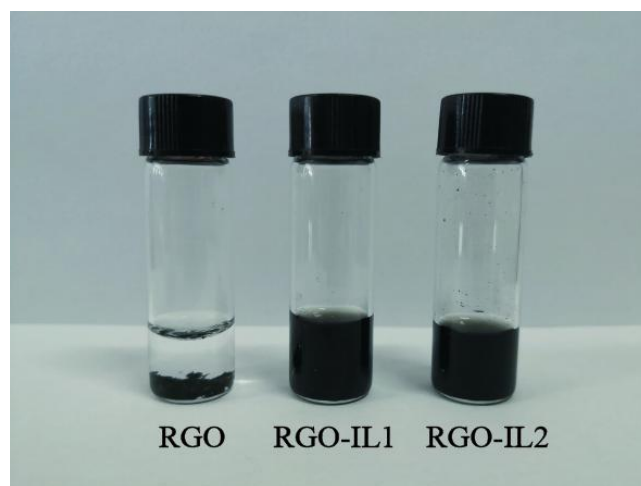

**Figure S1.** Photograph of the water dispersions of RGO, RGO-IL1 and RGO-IL2.

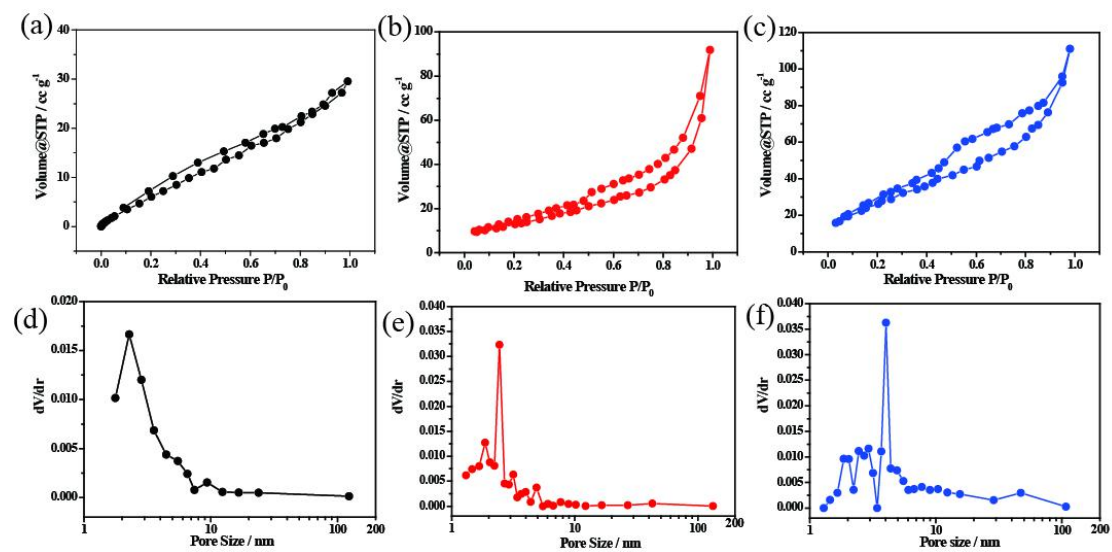

**Figure S2.** Nitrogen adsorption isotherms of (a) RGO, (b) RGO-IL1 and (c) RGO-IL2. BJH desorption pore size distribution curves of (d) RGO, (e) RGO-IL1 and (f) RGO-IL2.

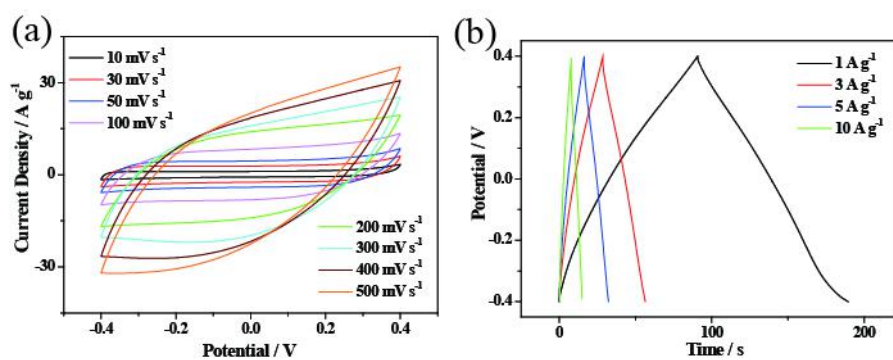

**Figure S3.** (a) CV curves of RGO at different scanning rates in the potential range from -0.4 to 0.4 V in 1.0 M H<sub>2</sub>SO<sub>4</sub>. (b) GCD curves of RGO at current density from 1 to 10 A g<sup>-1</sup> in 1.0 M H<sub>2</sub>SO<sub>4</sub>.

**Table S1.** Comparison of RGO-IL1 and RGO-IL2 with other graphene electrodes in terms of specific capacitance and measurement conditions.

| Electrodes                  | Electrolyte                        | Current density ( $\text{A g}^{-1}$ ) | Specific capacitance ( $\text{F g}^{-1}$ ) | Ref.      |
|-----------------------------|------------------------------------|---------------------------------------|--------------------------------------------|-----------|
| OHCF                        | 1M TEABF <sub>4</sub> /AN          | 1                                     | 188                                        | 44        |
| CNDHS                       | 1M TEABF <sub>4</sub> /AN          | 1                                     | 183                                        | 45        |
| The crumpled graphene balls | 5M KOH                             | 0.1                                   | 181                                        | 46        |
| Cl-RGO                      | 1M H <sub>2</sub> SO <sub>4</sub>  | 1                                     | 178                                        | 47        |
| Ionothermal-RGO             | 6M KOH                             | 0.2                                   | 155                                        | 48        |
| MCNM                        | 1M TEABF <sub>4</sub> /AN          | 1                                     | 149                                        | 49        |
| CNT/graphene                | PVA-H <sub>3</sub> PO <sub>4</sub> | 1                                     | 138                                        | 50        |
| RGO                         | 1M H <sub>2</sub> SO <sub>4</sub>  | 1                                     | 114                                        | This work |
| RGO-IL1                     | 1M H <sub>2</sub> SO <sub>4</sub>  | 1                                     | 173                                        | This work |
| RGO-IL2                     | 1M H <sub>2</sub> SO <sub>4</sub>  | 1                                     | 193                                        | This work |

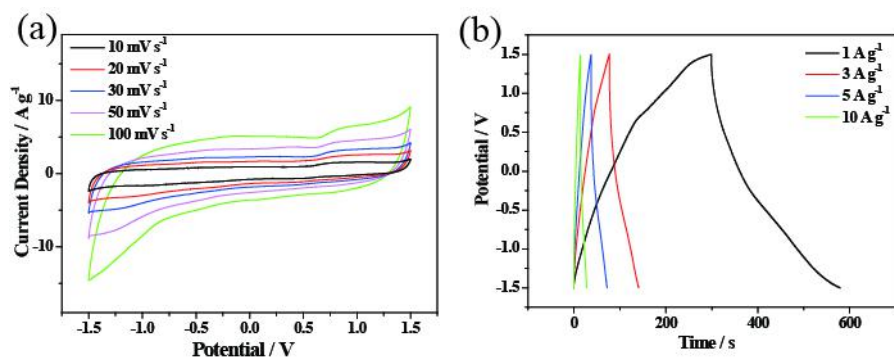

**Figure S4.** (a) CV curves of RGO at different scanning rates in the potential range from -1.5 to 1.5 V in [Bmim]PF<sub>6</sub>/AN (m:m = 1:1). (b) GCD curves of RGO at current density from 1 to 10 A g<sup>-1</sup> in [Bmim]PF<sub>6</sub>/AN (m:m = 1:1).

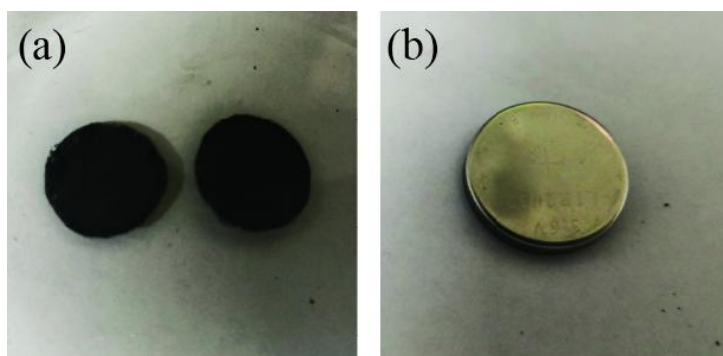

**Figure S5.** Photographs of (a) the completed RGO-IL electrode slices and (b) the assembled coin-type supercapacitor based on RGO-IL.

**Table S2.** Comparison of RGO-IL1 and RGO-IL2 with other ionic liquid modified RGO supercapacitor in terms of potential

window and energy density.

| Electrodes   | Electrolyte                  | Potential window (V) | Energy density ( Wh kg <sup>-1</sup> ) | Ref.      |
|--------------|------------------------------|----------------------|----------------------------------------|-----------|
| PIL:RG-O     | 1M EMIM-NTf <sub>2</sub>     | 3.5                  | 6.50                                   | 30        |
| ILG          | 1M [Bmim]PF <sub>6</sub> /AN | 2.2                  | 25.30                                  | 32        |
| PIL:RGO      | [MPPy][TFSI]                 | 2.0                  | 40.00                                  | 34        |
| rGO-Im-IL    | PVA-NaCl                     | 2.0                  | 36.67                                  | 54        |
| IL-RGO       | 1M EMIMBF <sub>4</sub>       | 4.0                  | 49.00                                  | 61        |
| FGO-178/POAP | 0.1M HClO <sub>4</sub>       | 1.1                  | 48.33                                  | 62        |
| RGO-IL1      | 1M [Bmim]PF <sub>6</sub> /AN | 3.0                  | 32.02                                  | This work |
| RGO-IL2      | 1M [Bmim]PF <sub>6</sub> /AN | 3.0                  | 50.19                                  | This work |
